# Supplementary material for: Intervention to reduce heat stress and improve efficiency among sugarcane workers in El Salvador: Phase 1
Source: PubMed Central journal article supplement — Occup Environ Med. 2016 Apr 12;73(6):409–16. doi: 10.1136/oemed-2016-103555 (PMC4893112; doi:10.1136/oemed-2016-103555), 2016-04-12
Supplement: oemed-2016-103555-s1.pdf [file oemed-2016-103555-s1.pdf]

## RESUMEN:

**Antecedentes:** El estrés térmico y la deshidratación crónicos por trabajo extenuante en ambientes calientes se consideran un componente esencial de la epidemia de enfermedad renal crónica en América Central.

**Objetivo:** 1) Evaluar la factibilidad de implementar una intervención Agua.Descanso.Sombra (A.D.S) durante el proceso de cortar caña de azúcar; 2) prevenir el estrés térmico y la deshidratación sin disminuir la productividad.

**Métodos:** La intervención consistió en la implementación adaptada de las pautas de A.D.S de OSHA, a mediados de la cosecha de 6 meses. A un grupo de 60 cortadores se les suministró agua en mochilas individuales, áreas móviles de descanso en la sombra y períodos de descanso regulares. Además, se introdujeron machetes ergonómicamente mejorados y estrategias nuevas de eficiencia. Se recogieron datos de salud (antropométricos, sangre, orina, cuestionarios) antes de la cosecha, previo al inicio de la intervención, a mediados de la intervención y al final de la cosecha. Un subgrupo participó en grupos focales. Se registró la temperatura globo de bulbo húmedo (TGBH) diariamente. El empleador proporcionó registros de producción individual de los cortadores.

**Resultados:** Durante la cosecha, la TGBH superó 26°C desde las 9:00 am en adelante, alcanzando la temperatura máxima promedio de  $29.3 \pm 1.7$  °C aproximadamente a las 13.00. El consumo de agua auto-reportado aumentó un 25% post-intervención. Síntomas asociados a estrés térmico y deshidratación disminuyeron. La producción diaria individual aumentó de 5.1 a 7.3 toneladas/persona/día después de la intervención. Este aumento fue mayor que en otros grupos de corte en la empresa. Grupos focales reportaron una percepción positiva de los componentes de A.D.S. así como del machete nuevo y los programas de eficiencia.

**Conclusión:** Una intervención de A.D.S. es factible en el cultivo de la caña de azúcar y puede reducir notablemente el impacto de las condiciones de estrés térmico sobre los trabajadores. Con la atención debida a prácticas de trabajo, se puede lograr un menor impacto en la salud de los trabajadores y mantener la producción.
